# Supplementary material for: Global perturbation of stratospheric water and aerosol burden by Hunga eruption
Source: Springer Nature journal article supplement (doi:10.1038/s43247-022-00652-x), 2022-12-14
Supplement: MOESM1 [file 43247_2022_652_MOESM1_ESM.pdf › 43247_2022_652_MOESM1_ESM.pdf]

1    **Description of Additional Supplementary Files**

2

3

4    **File Name:** Movie S1

5    **Description:** Cloud top height 10-minute sequence from stereoscopic retrieval using GOES-  
6    17 and Himawari-8 geostationary satellite imagers.

7

8

9    **File Name:** Movie S2

10   **Description:** CLaMS daily sequence of hydrated plume evolution at 21 hPa pressure level.
